# Supplementary material for: In silico genetic robustness analysis of microRNA secondary structures: potential evidence of congruent evolution in microRNA
Source: PubMed Central journal article supplement (PMC2222248; doi:10.1186/1471-2148-7-223), 2007-11-13

(a)

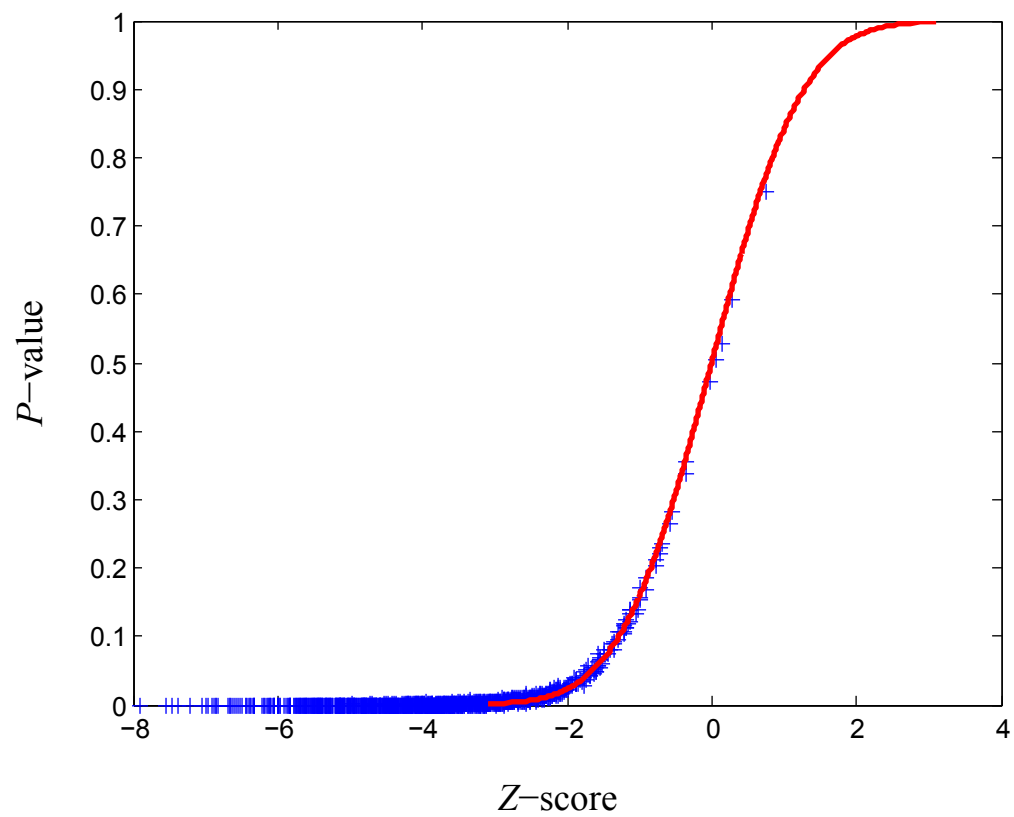

(b)

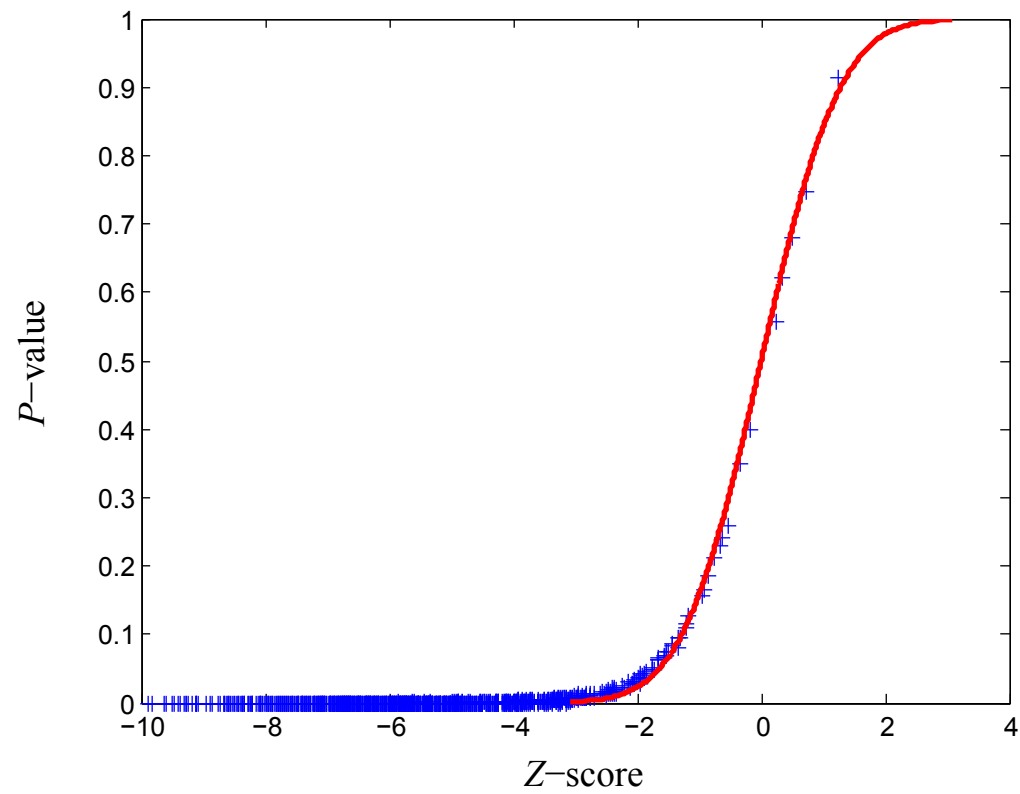

(c)

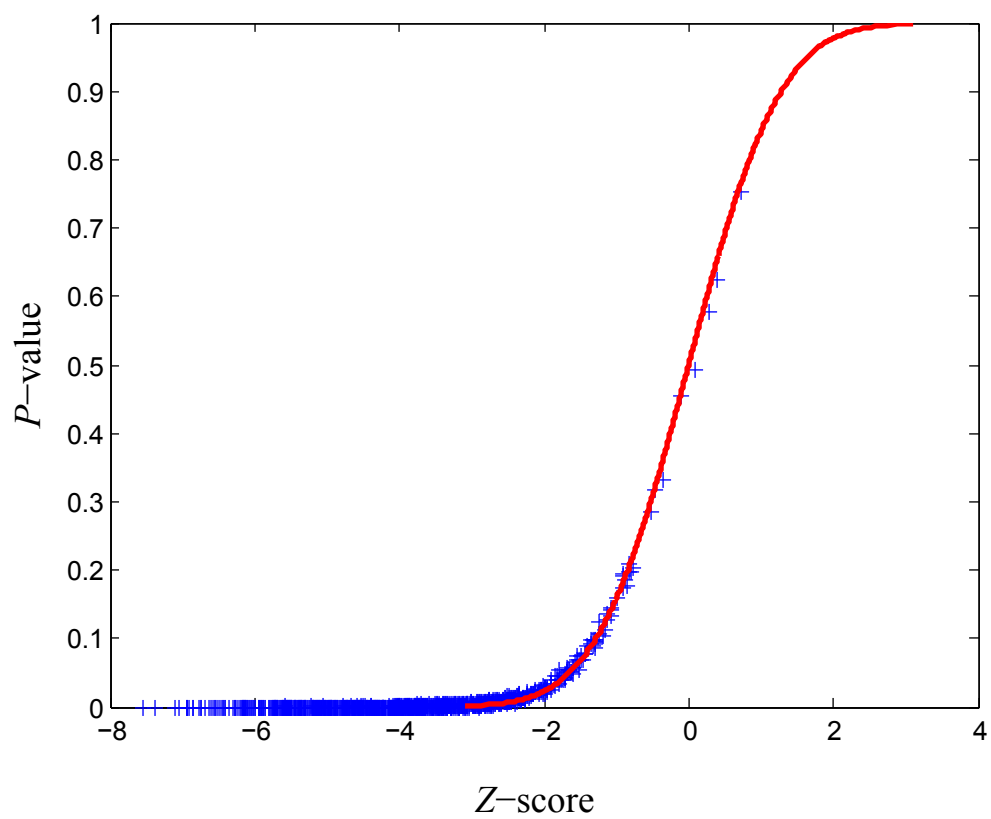

(d)

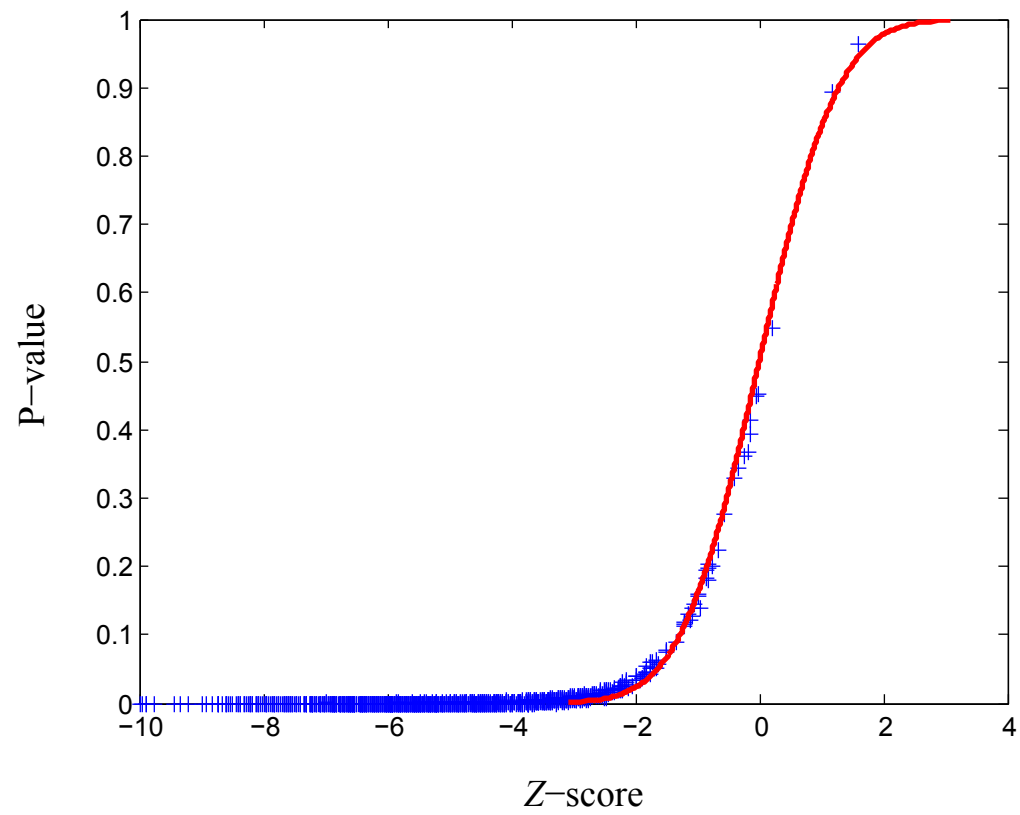

Supplement: 1471-2148-7-223-S7.pdf [file 1471-2148-7-223-S7.pdf]
